# Supplementary material for: Role of Citrullus colocynthis and Psidium guajava Mediated Green Synthesized Silver Nanoparticles in Disease Resistance against Aeromonas hydrophila Challenge in Labeo rohita
Source: MDPI journal article supplement (doi:10.3390/biomedicines11092349), 2023-08-23
Supplement: s1 [file s1]

**Table S1.** Summary of hematological parameters at 1 dpi. Values with a different superscript in the same row are significantly different.

| Hematological indices |                                | Control                    | <i>A. hyd</i>              | <i>A. hyd</i> + Amp (75 µg/L) | <i>A. hyd</i> + AgNPs (25 µg/L) | <i>A. hyd</i> + AgNPs (50 µg/L) | <i>A. hyd</i> + AgNPs (75 µg/L) |
|-----------------------|--------------------------------|----------------------------|----------------------------|-------------------------------|---------------------------------|---------------------------------|---------------------------------|
| Cc-AgNPs - Day 1      | Hemoglobin g/dl                | 3.60 ± 0.23 <sup>a</sup>   | 3.40 ± 0.11 <sup>a</sup>   | 3.30 ± 0.28 <sup>a</sup>      | 3.10 ± 0.34 <sup>a</sup>        | 4.60 ± 0.23 <sup>a</sup>        | 3.30 ± 0.11 <sup>a</sup>        |
|                       | WBC (TLC) ×10 <sup>3</sup> /uL | 2.10 ± 0.34 <sup>a</sup>   | 3.20 ± 0.40 <sup>a</sup>   | 2.30 ± 0.46 <sup>a</sup>      | 4.90 ± 0.23 <sup>b</sup>        | 6.60 ± 0.23 <sup>c</sup>        | 2.90 ± 0.28 <sup>a</sup>        |
|                       | Total RBC ×10 <sup>6</sup> /uL | 1.80 ± 0.34 <sup>a</sup>   | 1.60 ± 0.28 <sup>a</sup>   | 16.0 ± 3.46 <sup>b</sup>      | 2.10 ± 0.34 <sup>a</sup>        | 1.90 ± 0.40 <sup>a</sup>        | 1.50 ± 0.17 <sup>a</sup>        |
|                       | MCV fL                         | 75.00 ± 1.73 <sup>a</sup>  | 95.00 ± 1.73 <sup>b</sup>  | 92.10 ± 4.04 <sup>b</sup>     | 89.00 ± 5.19 <sup>b</sup>       | 88.00 ± 1.73 <sup>b</sup>       | 89.00 ± 1.73 <sup>b</sup>       |
|                       | HCT (PVC) %                    | 6.30 ± 0.46 <sup>a</sup>   | 6.60 ± 0.23 <sup>a</sup>   | 8.93 ± 0.26 <sup>b</sup>      | 11.30 ± 0.28 <sup>c</sup>       | 12.27 ± 0.43 <sup>c</sup>       | 8.60 ± 0.23 <sup>a</sup>        |
|                       | Platelets ×10 <sup>3</sup> /uL | 232.00 ± 4.04 <sup>a</sup> | 345.00 ± 2.88 <sup>b</sup> | 455.00 ± 2.88 <sup>c</sup>    | 211.00 ± 1.73 <sup>a</sup>      | 110.00 ± 2.30 <sup>d</sup>      | 256.00 ± 1.15 <sup>a</sup>      |
|                       | MCH %                          | 89.00 ± 2.30 <sup>a</sup>  | 89.00 ± 1.73 <sup>a</sup>  | 58.00 ± 1.73 <sup>b</sup>     | 69.00 ± 3.46 <sup>b</sup>       | 89.00 ± 4.04 <sup>a</sup>       | 69.00 ± 2.30 <sup>a</sup>       |
|                       | MCHC %                         | 100.00 ± 4.61 <sup>a</sup> | 110.00 ± 2.88 <sup>b</sup> | 66.00 ± 2.30 <sup>c</sup>     | 89.33 ± 1.85 <sup>d</sup>       | 98.00 ± 3.46 <sup>a</sup>       | 88.00 ± 4.61 <sup>d</sup>       |
| Pg-AgNPs- Day 1       | Hemoglobin g/dl                | 3.40 ± 0.11 <sup>a</sup>   | 3.60 ± 0.23 <sup>a</sup>   | 3.40 ± 0.34 <sup>a</sup>      | 3.76 ± 0.92 <sup>a</sup>        | 3.80 ± 0.34 <sup>a</sup>        | 3.20 ± 0.17 <sup>a</sup>        |
|                       | WBC (TLC) ×10 <sup>3</sup> /uL | 3.90 ± 0.57 <sup>a</sup>   | 2.70 ± 0.11 <sup>a</sup>   | 4.50 ± 0.28 <sup>a</sup>      | 4.60 ± 0.23 <sup>a</sup>        | 3.60 ± 0.23 <sup>a</sup>        | 3.40 ± 0.34 <sup>a</sup>        |
|                       | Total RBC ×10 <sup>6</sup> /uL | 1.90 ± 0.40 <sup>a</sup>   | 1.80 ± 0.40 <sup>a</sup>   | 2.10 ± 0.11 <sup>a</sup>      | 2.50 ± 0.17 <sup>a</sup>        | 2.10 ± 0.17 <sup>a</sup>        | 2.10 ± 0.11 <sup>a</sup>        |
|                       | MCV fL                         | 110.00 ± 1.15 <sup>a</sup> | 119.00 ± 2.30 <sup>a</sup> | 99.00 ± 2.30 <sup>a</sup>     | 95.00 ± 1.73 <sup>a</sup>       | 118.00 ± 3.46 <sup>a</sup>      | 110.00 ± 1.15 <sup>a</sup>      |
|                       | HCT (PVC) %                    | 8.40 ± 0.23 <sup>a</sup>   | 6.80 ± 0.34 <sup>b</sup>   | 6.20 ± 0.11 <sup>b</sup>      | 6.10 ± 0.34 <sup>b</sup>        | 6.60 ± 0.23 <sup>b</sup>        | 7.20 ± 0.23 <sup>a</sup>        |
|                       | Platelets ×10 <sup>3</sup> /uL | 218.00 ± 3.46 <sup>a</sup> | 118.00 ± 2.30 <sup>b</sup> | 221.00 ± 1.73 <sup>a</sup>    | 98.00 ± 3.46 <sup>b</sup>       | 122.00 ± 1.15 <sup>b</sup>      | 188.00 ± 2.30 <sup>a</sup>      |
|                       | MCH %                          | 56.00 ± 2.30 <sup>a</sup>  | 59.00 ± 1.73 <sup>a</sup>  | 56.00 ± 1.15 <sup>a</sup>     | 59.00 ± 2.30 <sup>a</sup>       | 65.67 ± 1.45 <sup>a</sup>       | 65.67 ± 2.02 <sup>a</sup>       |
|                       | MCHC %                         | 49.00 ± 2.30 <sup>a</sup>  | 67.00 ± 2.88 <sup>b</sup>  | 68.00 ± 3.46 <sup>b</sup>     | 74.00 ± 2.30 <sup>b</sup>       | 75.00 ± 1.15 <sup>b</sup>       | 98.00 ± 1.15 <sup>b</sup>       |
